## REFERENCES

1. Paloheimo M: ABM Guide to Clinical Applications. Helsinki, DATEX Instrumentarium Corp. 1985, pp 41-48
2. Paloheimo M, Wirtavuori K, Malinen S: Relaxograph® User's Guide. Helsinki, DATEX Instrumentarium Corp., 1987

Anesthesiology  
69:144, 1988

## CPAP or CPP?

To the Editor:—Slinger *et al.*<sup>1</sup> have applied continuous positive airway pressure (CPAP) to the non-dependent lung during one-lung ventilation for thoracic surgery, and found an improvement in arterial oxygenation. Their method of application of CPAP was very unique and effective. I believe that the meaning of CPAP used

by authors in their article is continuous positive pressure applied to the non-dependent lung in order to maintain a static inflation during thoracic surgery. Since the definition of CPAP, which is a well-established entity, is continuous positive pressure applied to the patient who is breathing spontaneously,<sup>2</sup> the authors' choice of word CPAP may be confusing and, perhaps, incorrect. Would continuous positive pressure (CPP) or prolonged positive airway pressure be the more appropriate term? There is a distinct difference in the airway pressure curve between CPAP and CPP (fig. 1). Although there is far from universal agreement on terminology used in respiratory care, it must have sound technical and physiological basis, and be clinically useful without confusion.

CHONG M. LEE, M.D.  
Department of Anesthesiology  
St. Elizabeth Hospital Medical Center  
Youngstown, Ohio 44504

## REFERENCES

1. Slinger P, Triolet W, Wilson J: Improving arterial oxygenation during one-lung ventilation. ANESTHESIOLOGY 68:291-295, 1988
2. Gregory GH, Kitterman JA, Phibbs RH, Tooley WH, Hamilton WK: Treatment of the idiopathic respiratory-distress syndrome with continuous positive airway pressure. N Engl J Med 284:1333-1340, 1971

(Accepted for publication March 15, 1988.)

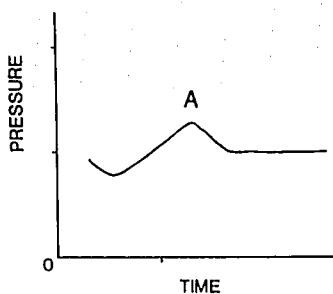

FIG. 1. Airway pressure curves. A. CPAP. B. CPP.

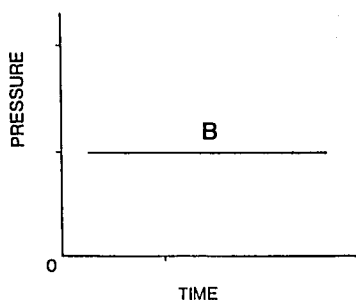

Anesthesiology  
69:144-145, 1988

In Reply:—Dr. Lee is correct that using the term CPAP to describe the current well-established practice of improving arterial oxygenation by positive pressure insufflation of oxygen to the non-ventilated lung during thoracic surgery may lead to some confusion, because CPAP was initially described for spontaneously breathing patients.

In a clinical study in 1980, Capan *et al.*<sup>1</sup> referred to "oxygen insufflation into the upper lung at 10 cm H<sub>2</sub>O" during one-lung anesthesia and avoided using an acronym. In 1981, Alfery *et al.*<sup>2</sup> referred to this technique as "PEEP to the non-ventilated lung." In 1982, Benumof<sup>3</sup> stated "a better term for this ventilatory pattern arrangement would be non-ventilated lung contin-
